# Supplementary material for: Hydrothermal Fabrication of Spindle-Shaped ZnO/Palygorskite Nanocomposites Using Nonionic Surfactant for Enhancement of Antibacterial Activity
Source: MDPI journal article supplement (doi:10.3390/nano9101453), 2019-10-13
Supplement: s1 [file s1]

## Supplementary Materials

# Hydrothermal Fabrication of Spindle-Shaped ZnO/Palygorskite Nanocomposites Using Nonionic Surfactant for Enhancement of Antibacterial Activity

Aiping Hui <sup>1</sup>, Shuqing Dong <sup>1</sup>, Yuru Kang <sup>1</sup>, Yanmin Zhou <sup>2</sup> and Aiqin Wang <sup>1,\*</sup>

<sup>1</sup> Key Laboratory of Clay Mineral Applied Research of Gansu Province, Center of Eco-material and Green Chemistry, Lanzhou Institute of Chemical Physics, Chinese Academy of Sciences, Lanzhou 730000, China; aphui1215@163.com (A.H.); sqdong@licp.cas.cn (S.D.); yurukang@licp.cas.cn (Y.K.)

<sup>2</sup> College of Animal Science and Technology, Nanjing Agricultural University, Nanjing 210095, China; zhouym6308@163.com (Y.Z.)

\* Correspondence: aqwang@licp.cas.cn; Tel.: +86-931-4868-118

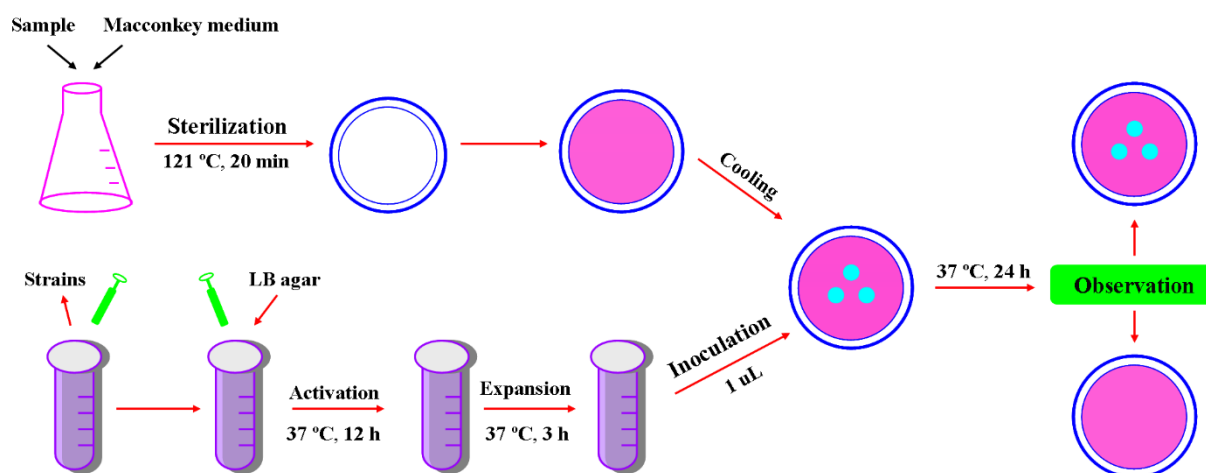

**Figure S1.** Schematic illustration for the antibacterial test.

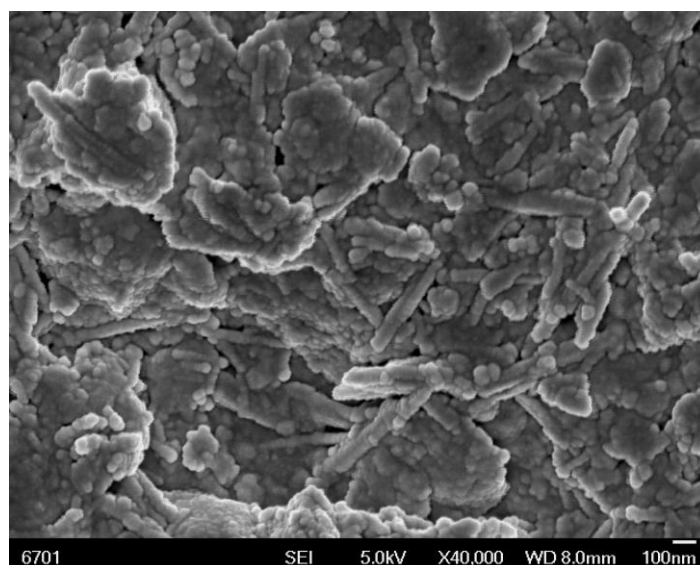

**Figure S2.** SEM image of PAL.

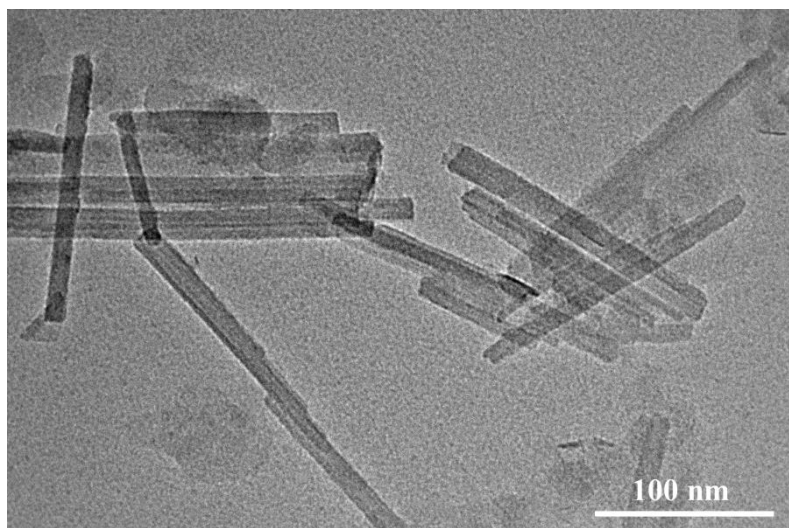

**Figure S3.** TEM image of PAL.

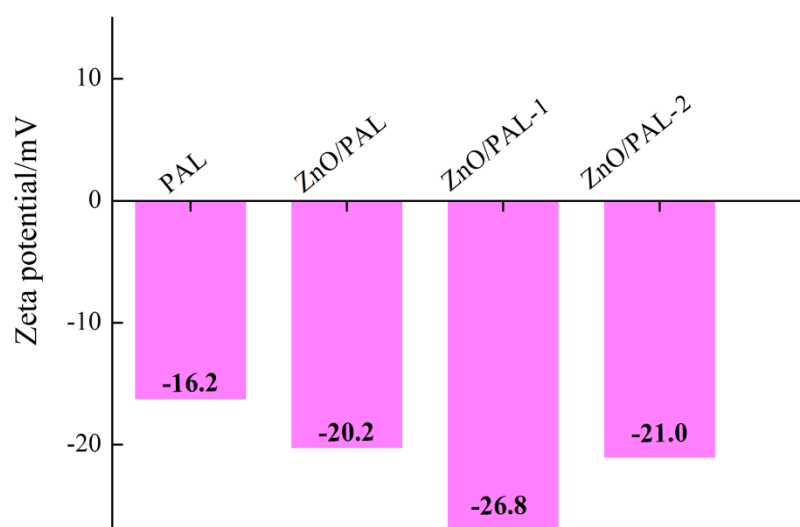

**Figure S4.** Zeta potential of PAL, ZnO/PAL, ZnO/PAL-1 and ZnO/PAL-2, the pH was 6.3 (aqueous solution).

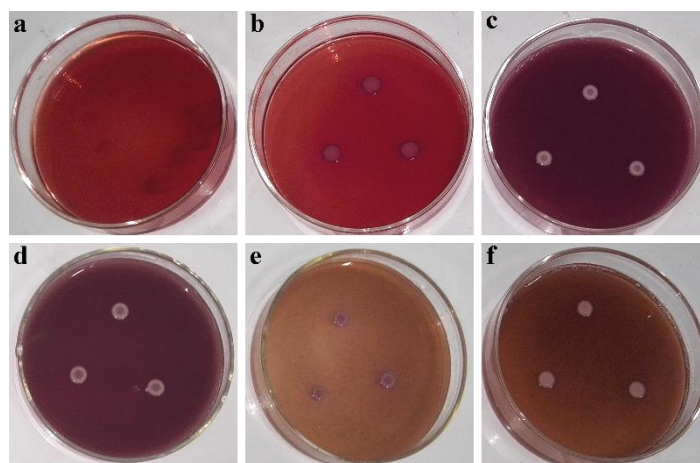

**Figure S5.** (a) Blank control, (b) positive control of *E. coli*, *E. coli* treated by PAL with various concentrations of (c) 50 mg/mL, (d) 20 mg/mL, (e) 10 mg/mL, (f) 1 mg/mL.

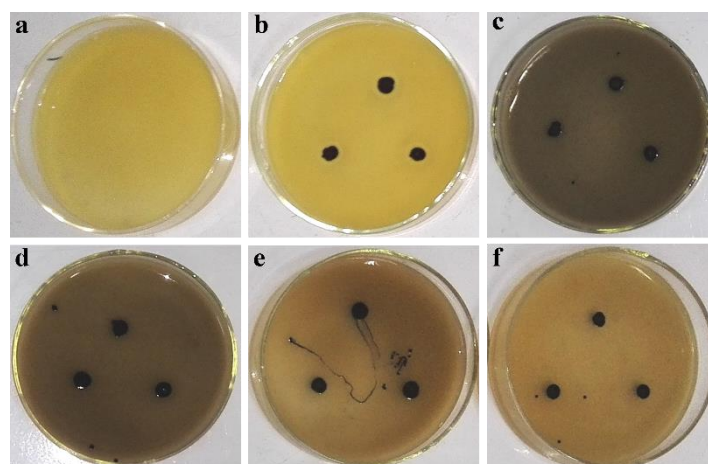

**Figure S6.** (a) Blank control, (b) positive control of *S. aureus*, *S. aureus* treated by PAL with various concentrations of (c) 50 mg/mL, (d) 20 mg/mL, (e) 10 mg/mL, (f) 1mg/mL.

#### Preparation of ZnO/PAL Nanocomposites

Natural PAL was crushed and purified by 2%  $\text{H}_2\text{SO}_4$  solution with a solid/liquid ratio of 1:10 deionized water solution corresponding to PAL mass to remove the associated carbonates, and the purified PAL was filtered by passing through a 200-mesh sieve for further use. ZnO/PAL nanocomposites were fabricated by hydrothermal process. Typically, 15 mM  $\text{Zn}(\text{NO}_3)_2 \cdot 6\text{H}_2\text{O}$  and 2.7 g PAL and 225 mM NaOH were dissolved into 130 mL deionized water. Constant stirring for 30 min, different content (0.25, 0.5, 1.5, 2.0 wt%) of Span 40 and (0.25, 0.5, 1.5, 2.0 wt%) of Tween 20 corresponding to PAL were added into above solution, respectively. The mixture was ultrasonically dispersed for 60 min and then transferred into a 100 mL Teflon-lined stainless-steel autoclave, which was heated to 180 °C and maintained for 180 min. After being cooled to room temperature, the solid powder was collected by centrifugation and dried at 60 °C in an oven.

**Table S1.** The MIC values of ZnO/PAL nanocomposites prepared by different content of Span 40 against *E. coli* and *S. aureus*.

| Content of Span 40 (%) | MIC (mg/mL)    |     |     |   |                  |     |     |   |
|------------------------|----------------|-----|-----|---|------------------|-----|-----|---|
|                        | <i>E. coli</i> |     |     |   | <i>S. aureus</i> |     |     |   |
|                        | 5              | 2.5 | 1.5 | 1 | 5                | 2.5 | 1.5 | 1 |
| 0.25                   | ✓              | ✗   | ✗   | ✗ | ✗                | ✗   | ✗   | ✗ |
| 0.5                    | ✓              | ✓   | ✗   | ✗ | ✓                | ✗   | ✗   | ✗ |
| 1.5                    | ✓              | ✗   | ✗   | ✗ | ✓                | ✗   | ✗   | ✗ |
| 2                      | ✓              | ✗   | ✗   | ✗ | ✓                | ✗   | ✗   | ✗ |

✓—The sample could inhibit completely the growth of each bacterial strain

✗—The sample could not inhibit completely the growth of each bacterial strain

**Table S2.** The MIC values of ZnO/PAL nanocomposites prepared by different content of Tween 20 against *E. coli* and *S. aureus*.

| Content of Tween 20 (%) | MIC (mg/mL)    |     |     |   |                  |     |     |   |
|-------------------------|----------------|-----|-----|---|------------------|-----|-----|---|
|                         | <i>E. coli</i> |     |     |   | <i>S. aureus</i> |     |     |   |
|                         | 5              | 2.5 | 1.5 | 1 | 5                | 2.5 | 1.5 | 1 |
| 0.25                    | ✗              | ✗   | ✗   | ✗ | ✗                | ✗   | ✗   | ✗ |
| 0.5                     | ✓              | ✓   | ✗   | ✗ | ✓                | ✗   | ✗   | ✗ |
| 1.5                     | ✓              | ✓   | ✗   | ✗ | ✓                | ✗   | ✗   | ✗ |
| 2                       | ✓              | ✓   | ✗   | ✗ | ✓                | ✗   | ✗   | ✗ |

✓—The sample could inhibit completely the growth of each bacterial strain.

✗—The sample could not inhibit completely the growth of each bacterial strain.

**Table S3.** The ZnO loading of ZnO/PAL-1 and ZnO/PAL-2 determined by AAS.

| Samples   | Zn Content (%) | ZnO loading content (%) |
|-----------|----------------|-------------------------|
| ZnO/PAL-1 | 32.98          | 41.09                   |
| ZnO/PAL-2 | 32.75          | 40.81                   |
